# Supplementary material
Source: publisher figshare collection journal article supplement (https://wiley.figshare.com/articles/dataset/_/3567819)
Supplement: Supplementary file 1 [file 1 › appendix-D.htm]

Ecological Archives M081-021-A4


### *Ecological Archives* M081-021-A4

### Philip J. Harrison, Ilkka Hanski, and Otso Ovaskainen. 2011. Bayesian state-space modeling of metapopulation dynamics in the Glanville fritillary butterfly. *Ecological Monographs* 81:581–598.

Appendix D. MCMC (Markov chain Monte Carlo) implementation.

> View / download PDF.

---


[Back to M081-021]
